# Supplementary material for: Regulation of functional KCNQ1OT1 lncRNA by β-catenin
Source: PubMed Central journal article supplement (PMC4751614; doi:10.1038/srep20690), 2016-02-12
Supplement: srep20690-s1.pdf [file srep20690-s1.pdf]

## Supplementary information

### Regulation of functional *KCNQ1OT1* lncRNA by $\beta$ -catenin

Naohiro Sunamura<sup>1</sup>, Takahito Ohira<sup>1</sup>, Miki Kataoka<sup>1</sup>, Daigo Inaoka<sup>1</sup>, Hideyuki Tanabe<sup>2</sup>, Yuji

Nakayama<sup>3</sup>, Mitsuo Oshimura<sup>4</sup> and Hiroyuki Kugoh<sup>1,4\*</sup>

<sup>1</sup>Department of Biomedical Science, Institute of Regenerative Medicine and Biofunction, Graduate School of Medical Science, Tottori University, 86 Nishi-Cho, Yonago, Tottori 683-8503, Japan

<sup>2</sup>Department of Evolutionary Studies of Biosystems Science, School of Advanced Sciences, SOKENDAI (The Graduate University for Advanced Studies), Shonan Village, Hayama, Kanagawa 240-0193, Japan

<sup>3</sup>Division of Functional Genomics, Research Center for Bioscience and Technology, Tottori University, 86 Nishi-Cho, Yonago, Tottori 683-8503, Japan

<sup>4</sup>Chromosome Engineering Research Center, Tottori University, 86 Nishi-Cho, Yonago, Tottori 683-8503, Japan

\*Correspondence should be addressed to H.K. (kugoh@med.tottori-u.ac.jp).

Department of Biomedical Science, Institute of Regenerative Medicine and Biofunction, Graduate School of Medical Science, Tottori University, 86 Nishi-Cho, Yonago, Tottori 683-8503, Japan,

Telephone number: +81-859-38-6208. Fax number: +81-859-38-6210.

## Supplementary Figure S1

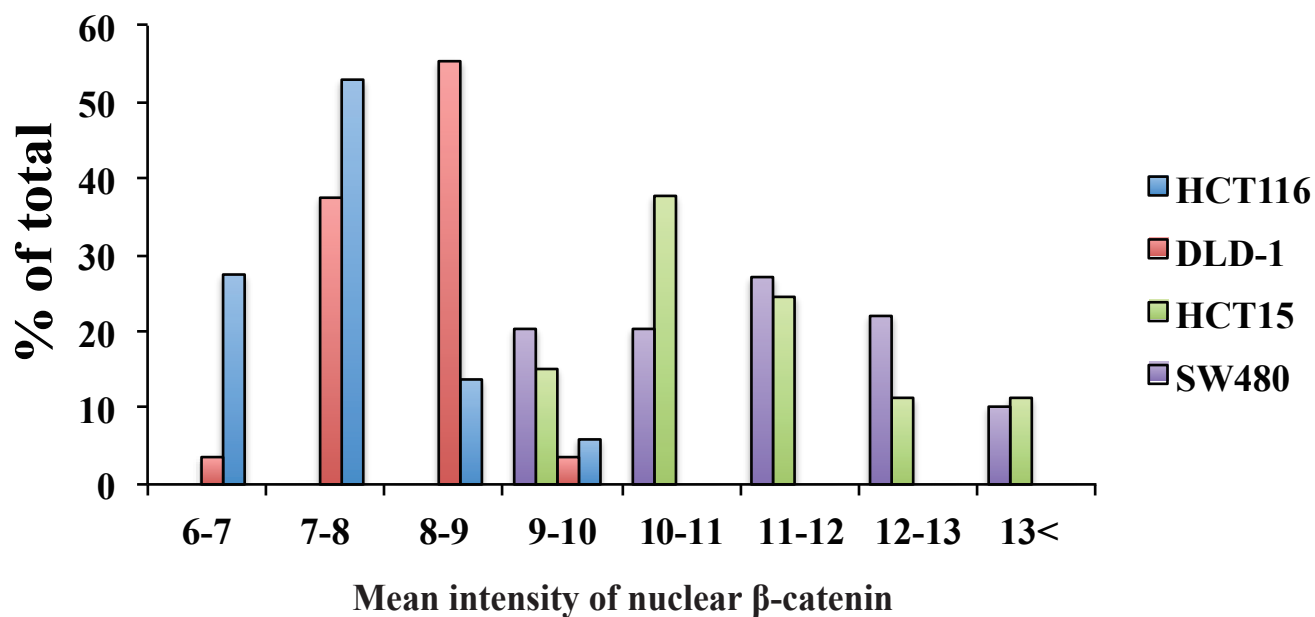

### Supplementary Figure S1. Level of nuclear $\beta$ -catenin protein in colorectal cancer cell lines.

Relative mean intensity of nuclear  $\beta$ -catenin protein in colorectal cancer cell lines was evaluated using immunofluorescence staining. The graphs indicate the mean intensity of a single nucleus in each colorectal cell line and nuclei are classified into several groups according to the level of nuclear  $\beta$ -catenin intensity.

## Supplementary Figure S2

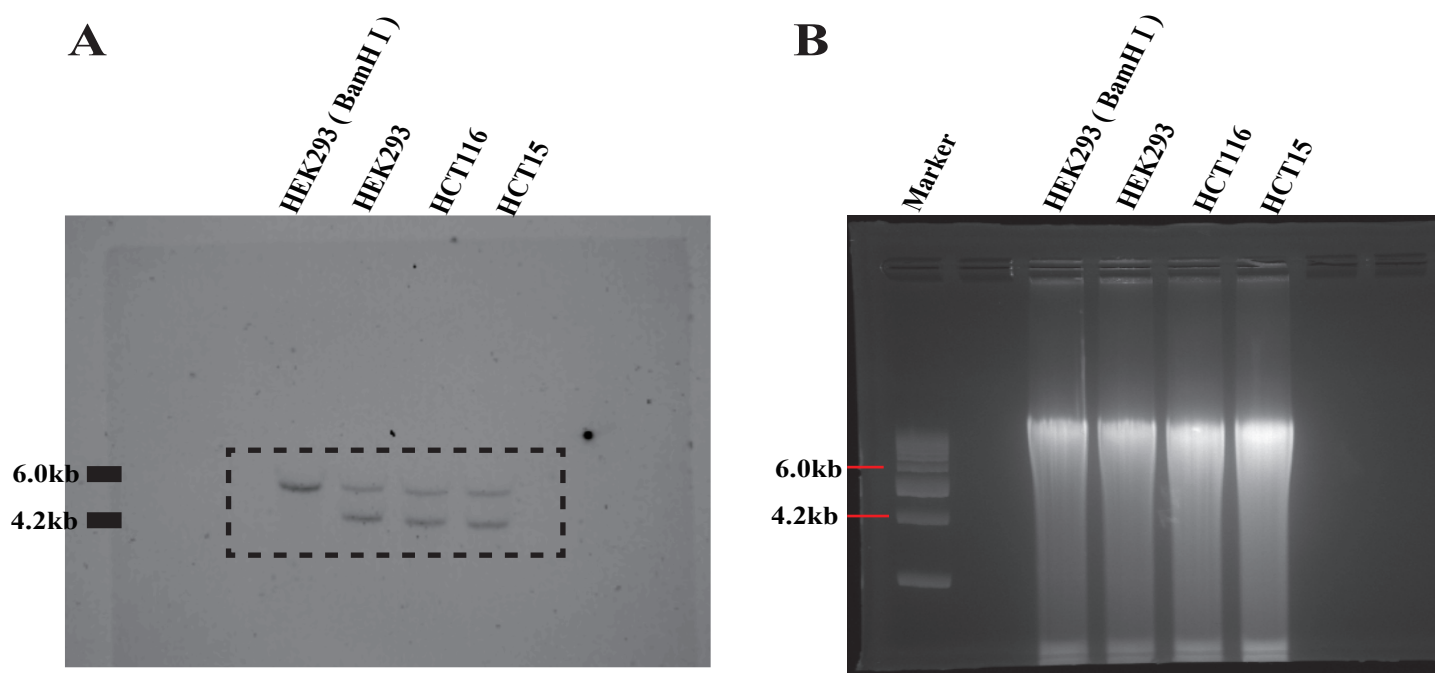

Supplementary Figure S2. Full-length southern blot image (A) and full-gel image (B) shown in Figure 1F. Dotted lines show the cropped areas (see Figure 1F).

# Supplementary Table S1

|        | Copy number of <i>KCNQ1OT1</i> (%) |    |   |   |   |
|--------|------------------------------------|----|---|---|---|
|        | 1                                  | 2  | 3 | 4 | 5 |
| HCT116 | 14                                 | 84 | 2 | 0 | 0 |
| HCT15  | 0                                  | 94 | 0 | 6 | 0 |

Supplementary Table S1. Copy number of *KCNQ1OT1* locus in HCT116 and HCT15 cells .

# Supplementary Figure S3

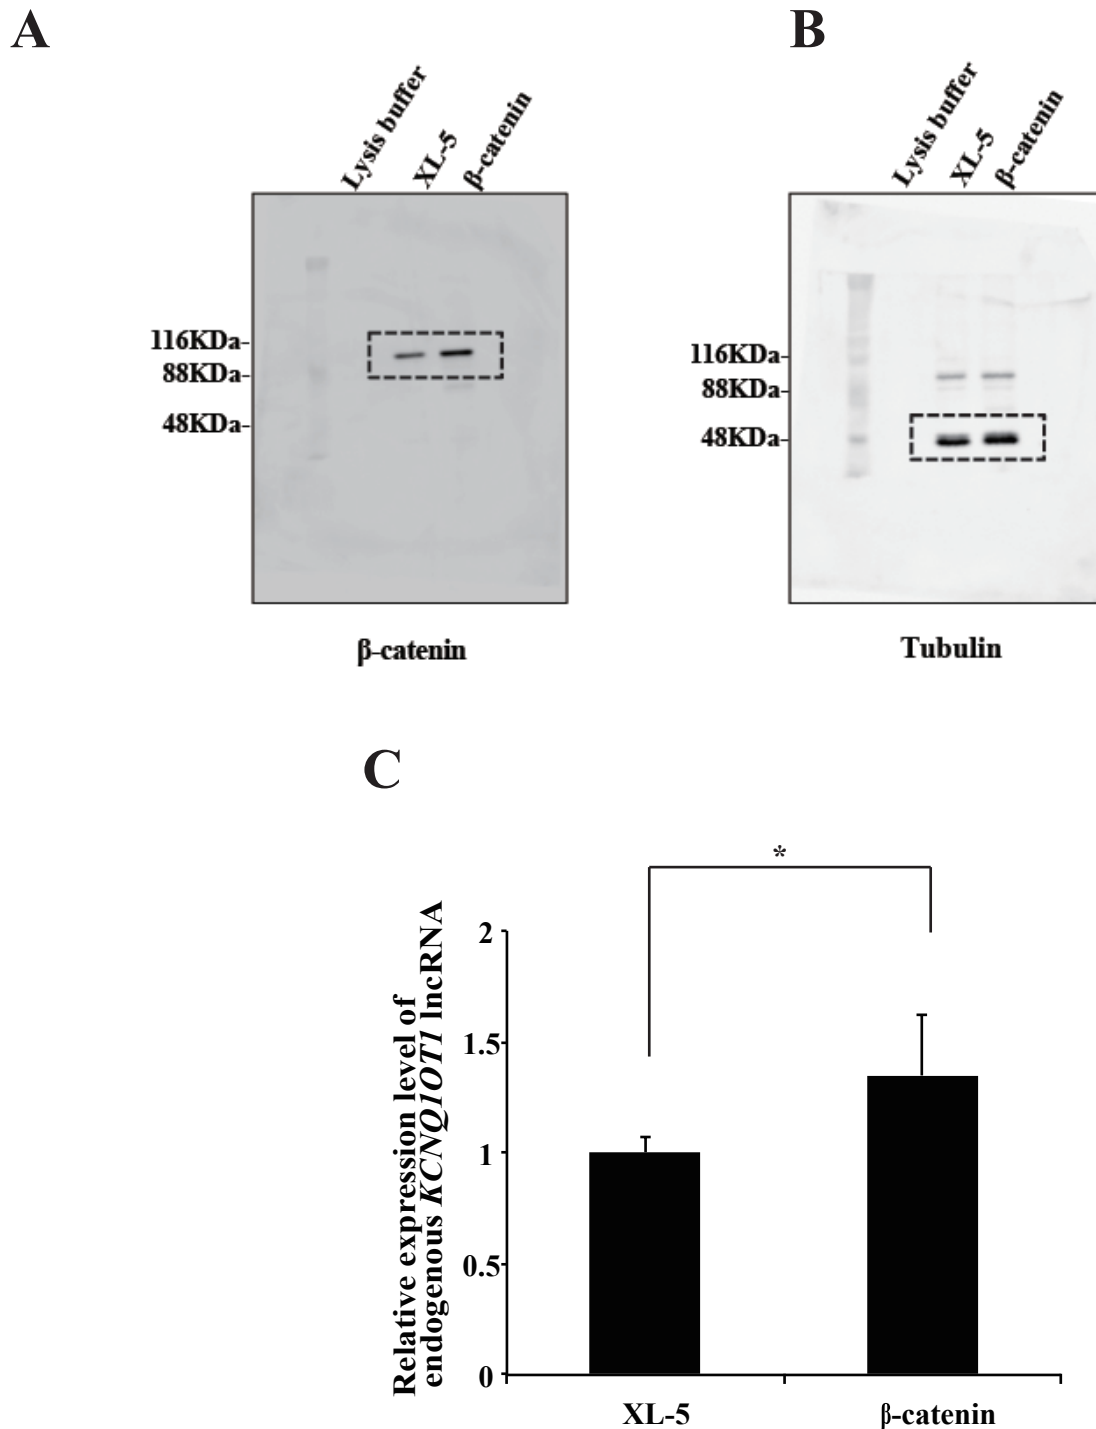

**Supplementary Figure S3. Full-length images of the Western blots shown in Figure 2B in the manuscript and qRT-PCR analysis of relative endogenous *KCNQ10T1* lncRNA transcription under the condition of excess  $\beta$ -catenin.**

The full-length Western blot image of (A) the anti- $\beta$ -catenin antibody blot and (B) the anti-tubulin antibody blot of Figure 2B. Dotted lines show the cropped areas (see Figure 2B). (C) Expression levels were normalized to *GAPDH* mRNA control. The expression level in HCT116 cells transfected with XL-5 vector was arbitrarily assigned as 1. Error bars represent means  $\pm$  S.D. of four independent experiments (\* $p$ <0.05).

# Supplementary Figure S4

**A**

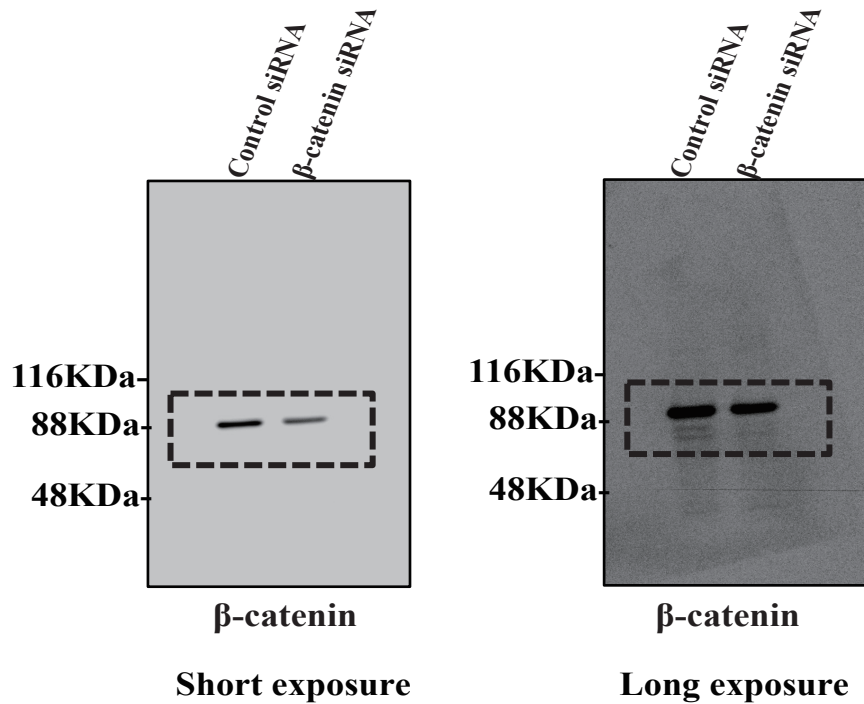

**B**

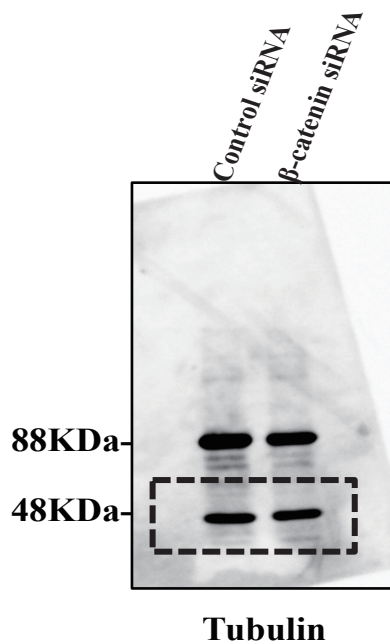

**Supplementary Figure S4. Full-length images of the Western blots shown in Figure 3B in the manuscript.**

The full-length Western blot images of Fig. 3B in the manuscript using (A) an anti- $\beta$ -catenin antibody and detected with a short (Left) and a long (Right) exposure, and (B) an anti-tubulin antibody. Dotted lines show the cropped areas (see Figure 3B).
